# Supplementary material
Source: HighWire-hosted journal article supplement (https://jcp.bmj.com/highwire/filestream/198266/field_highwire_adjunct_files/2/jcp-2022-208541supp003_data_supplement.pdf)
Supplement: jcp-2022-208541supp003_data_supplement.pdf [file jcp-2022-208541supp003_data_supplement.pdf]

| Subject ID | Disease status | Sample type | T cell lineage sorted | Number of events/cells sorted |
|------------|----------------|-------------|-----------------------|-------------------------------|
| 24330      | Control        | IEC         | CD8 TCR $\alpha\beta$ | 100,000                       |
| 24247      | Control        | IEC         | CD8 TCR $\alpha\beta$ | 3683                          |
| 488        | ACD            | IEC         | CD8 TCR $\alpha\beta$ | 26523                         |
| 489        | ACD            | IEC         | CD8 TCR $\alpha\beta$ | 12646                         |
| 472        | ACD            | IEC         | CD8 TCR $\alpha\beta$ | 143000                        |
| 462        | ACD            | IEC         | CD8 TCR $\alpha\beta$ | 167000                        |
| 490        | GFD            | IEC         | CD8 TCR $\alpha\beta$ | 9575                          |
| 487        | GFD            | IEC         | CD8 TCR $\alpha\beta$ | 168000                        |
|            |                |             |                       |                               |
| Subject ID | Disease status | Sample type | T cell lineage sorted | Number of events/cells sorted |
| 24330      | Control        | LPC         | CD4 TCR $\alpha\beta$ | 204036                        |
| 24247      | Control        | LPC         | CD4 TCR $\alpha\beta$ | 9836                          |
| 488        | ACD            | LPC         | CD4 TCR $\alpha\beta$ | 5693                          |
| 489        | ACD            | LPC         | CD4 TCR $\alpha\beta$ | 8058                          |
| 490        | GFD            | LPC         | CD4 TCR $\alpha\beta$ | 2452                          |
| 473        | GFD            | LPC         | CD4 TCR $\alpha\beta$ | 11043                         |
|            |                |             |                       |                               |
| Subject ID | Disease status | Sample type | T cell lineage sorted | Number of events/cells sorted |
| 24330      | Control        | IEC         | TCR $\gamma\delta$    | 78294                         |
| 24247      | Control        | IEC         | TCR $\gamma\delta$    | 133000                        |
| 472        | ACD            | IEC         | TCR $\gamma\delta$    | 3400                          |
| 462        | ACD            | IEC         | TCR $\gamma\delta$    | 176000                        |
| 487        | GFD            | IEC         | TCR $\gamma\delta$    | 177000                        |
| 490        | GFD            | IEC         | TCR $\gamma\delta$    | 6600                          |
